# Supplementary material for: High PHLPP1 expression levels predicts longer time of acquired resistance to EGFR tyrosine kinase inhibitors in patients with lung adenocarcinoma
Source: PubMed Central journal article supplement (PMC5601709; doi:10.18632/oncotarget.19777), 2017-08-01
Supplement: oncotarget-08-59000-s001.pdf [file oncotarget-08-59000-s001.pdf]

# High PHLPP1 expression levels predicts longer time of acquired resistance to EGFR tyrosine kinase inhibitors in patients with lung adenocarcinoma

## SUPPLEMENTARY MATERIALS

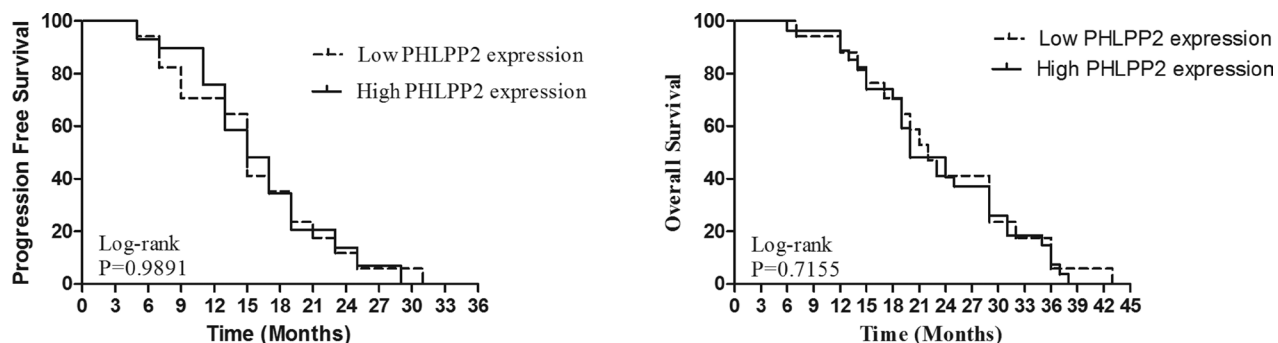

**Supplementary Figure 1: Kaplan-Meier PFS and OS curves of patients with high and low expression of PHLPP2.** Patients with high expression of PHLPP2 showed significantly longer PFS and OS than those with low expression of PHLPP2 (15 months versus 15 months, 20 months versus 22 months, respectively).

**Supplementary Table 1: PHLPP 2 and baseline characteristics of patients**

|                        | No. of case | PHLPP2 expression |                | <i>P</i> value |
|------------------------|-------------|-------------------|----------------|----------------|
|                        |             | High expression   | Low expression |                |
| Age (Median = 60 yeas) |             |                   |                |                |
| ≤ 60 years             | 38          | 24                | 14             | 0.742          |
| > 60 years             | 37          | 22                | 15             |                |
| Gender                 |             |                   |                |                |
| Male                   | 33          | 22                | 11             | 0.401          |
| Female                 | 42          | 24                | 18             |                |
| Smoking Status         |             |                   |                |                |
| Ever-smoker            | 19          | 10                | 9              | 0.837          |
| Never-smoker           | 56          | 31                | 25             |                |
| EGFR-TKI               |             |                   |                |                |
| Erlotinib              | 38          | 26                | 12             | 0.201          |
| Gefitinib              | 37          | 20                | 17             |                |
| T                      |             |                   |                |                |
| 1                      | 21          | 14                | 7              | 0.693          |
| 2                      | 39          | 23                | 16             |                |
| 3                      | 12          | 8                 | 4              |                |
| 4                      | 3           | 1                 | 2              |                |
| N                      |             |                   |                |                |
| 0                      | 37          | 26                | 11             | 0.415          |
| 1                      | 20          | 11                | 9              |                |
| 2                      | 13          | 7                 | 6              |                |
| 3                      | 5           | 2                 | 3              |                |
| p-Akt (S473)           |             |                   |                |                |
| Positive               | 14          | 9                 | 5              | 0.801          |
| Negative               | 61          | 37                | 24             |                |
| p-ERK 1/2              |             |                   |                |                |
| Positive               | 24          | 14                | 10             | 0.714          |
| Negative               | 51          | 32                | 19             |                |
| EGFR                   |             |                   |                |                |
| Mutation               | 42          | 25                | 17             | 0.717          |
| Unknown                | 33          | 21                | 12             |                |

**Supplementary Table 2: Univariate analysis of overall survival in patients with lung adenocarcinoma treated with EGFR-TKI**

| <b>Variables</b>       |                                          | <b>HR</b> | <b>95% CI</b> | <b>p value</b> |
|------------------------|------------------------------------------|-----------|---------------|----------------|
| Age                    | ≤ 60 years vs. > 60years (Ref.)          | 1.012     | 0.554–1.847   | 0.970          |
| Gender                 | Female vs. Male (Ref)                    | 0.570     | 0.313–1.039   | 0.067          |
| Smoking Status         | Never-smoker vs. Ever-smoker (Ref)       | 0.530     | 0.284–0.990   | 0.047          |
| EGFR-TKI               | Erlotinib vs. Gefitinib (Ref)            | 0.975     | 0.518–1.835   | 0.938          |
| T                      | 1 and 2 vs. 3 and 4 (Ref)                | 1.774     | 0.852–3.692   | 0.126          |
| N                      | 0 and 1 vs. 2 and 3 (Ref)                | 2.095     | 1.189–3.693   | 0.011          |
| PHLPP1 expression      | High expression vs. Low expression (Ref) | 0.284     | 0.155–0.518   | 0.000          |
| PHLPP2 expression      | High expression vs. Low expression (Ref) | 0.933     | 0.501–1.737   | 0.827          |
| pAKT (S473) expression | High expression vs. Low expression (Ref) | 1.561     | 0.765–3.185   | 0.221          |
| pERK 1/2 expression    | High expression vs. Low expression (Ref) | 0.581     | 0.301–1.121   | 0.105          |

**Supplementary Table 3: Multivariate analysis of overall survival in patients with lung adenocarcinoma treated with EGFR-TKI**

| <b>Variables</b>       |                                          | <b>HR</b> | <b>95%CI</b> | <b>p value</b> |
|------------------------|------------------------------------------|-----------|--------------|----------------|
| Gender                 | Female vs. Male (Ref)                    | 0.687     | 0.274–1.679  | 0.401          |
| Smoking Status         | Never-smoker vs. Ever-smoker (Ref)       | 0.664     | 0.246–1.797  | 0.420          |
| N                      | 0 and 1 vs. 2 and 3 (Ref)                | 1.135     | 0.595–2.166  | 0.701          |
| PHLPP1 expression      | High expression vs. Low expression (Ref) | 0.298     | 0.152–0.584  | 0.000          |
| pAKT (S473) expression | High expression vs. Low expression (Ref) | 1.679     | 0.491–3.001  | 0.675          |
| pERK 1/2 expression    | High expression vs. Low expression (Ref) | 0.577     | 0.283–1.176  | 0.130          |
